# Supplementary material for: Effect of Sensory Deprivation of Nasal Respiratory on Behavior of C57BL/6J Mice
Source: MDPI journal article supplement (doi:10.3390/brainsci11121626), 2021-12-09
Supplement: s1 [file s1]

Supporting information for

**Effect of Sensory Deprivation of Nasal Respiratory on Behavior  
of C57BL/6J Mice**

Yongji Zhu 1,†, Yujing Ye 1,†, Chenyang Zhou 1,†, Siqu Sun 1, Jingjing Zhang 1, Zixuan Zhao 1, Tingting Sun 2,

Jing Li 3, Jing Yang 1, Weiyun Li 1,\* and Shanshan Li 1,\*

1 Department of Basic Medicine, School of Medicine, Zhejiang University City College, Hangzhou 310015, China; zyj2901142505@163.com (Y.Z.); yyj000426@163.com (Y.Y.); zhoucy9086@163.com (C.Z.); ssq44747@163.com (S.S.); hata6r@163.com (J.Z.); zzx001110@163.com (Z.Z.); yangjing@zucc.edu.cn (J.Y.)

2 College of Food Science and Pharmaceutical Engineering, Zaozhuang University, Zaozhuang 277160, China; suntingting1218@126.com

3 Institute of Neuroscience and Anatomy, School of Medicine, Zhejiang University, Hangzhou 310058, China; lijing851@zju.edu.cn

\* Correspondence: liweiyun@zucc.edu.cn (W.L.); liss0220@zucc.edu.cn (S.L.); Tel.: +(86)-571-8801-5208 (S.L.)

† These authors contributed equally to this work.

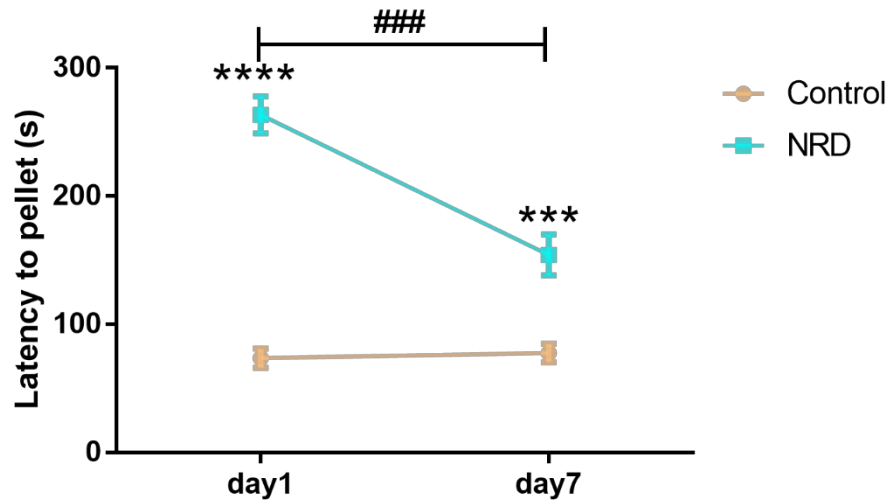

**Figure S1.**

To evaluate the effect of zinc sulfate irrigation on the olfaction of mice, the food-seeking test at 1 and 7 days after nasal irrigation was performed as our previous described [17]. Result shows that zinc sulfate irrigation will affect the sense of smell of mice, and will recover to a certain extent with time. \*\*\* $P < 0.001$ , \*\*\*\* $P < 0.0001$ , Control vs NRD; ### $P < 0.001$  NRD day1 vs NRD day7; Two-way ANOVA.  $n(\text{control})=12$ ,  $n(\text{NRD})=12$ .
